# Supplementary material
Source: PubMed Central journal article supplement (PMC3040979)
Supplement: NIHMS261028-supplement-01.pdf [file NIHMS261028-supplement-01.pdf]

Supplementary material S1.

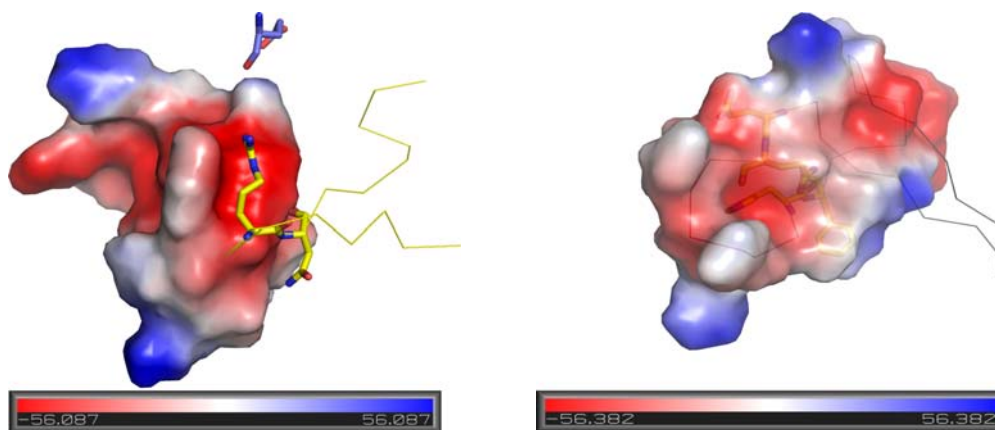

- a) Electrostatic surface of *Ec*FAAL insertion motif. Hinge region is shown in yellow. Arg469 binds to the negatively charged pocket. b) Electrostatic surface of the *Lp*FAAL insertion motif.

Supplementary material S2.

List of residues at the interface of acyl adenylate and *Ec*FAAL or *Lp*FAAL. Residues not conserved are shown in italics. Residues from gate motif highlighted in yellow.

| EcFAAL                            | LpFAAL |
|-----------------------------------|--------|
| <b>N-terminal domain residues</b> |        |
| Thr184                            | Thr173 |
| Ser185                            | Gly175 |
| Ile208                            | Ile197 |
| Ile213                            | Phe201 |
| Leu215                            | Mse203 |
| Cys221                            | Ile209 |
| His229                            | His217 |
| Asp230                            | Asp218 |
| Mse231                            | Mse219 |
| Gly235                            | Gly223 |
| Phe236                            | Cys224 |
| Thr239                            | -      |
| Val273                            | -      |
| Val275                            | Ile261 |
| -                                 | Phe293 |
| Gly307                            | Gly295 |
| Ala308                            | Ala296 |
| Glu309                            | Glu297 |
| Pro310                            | Pro298 |
| Ile311                            | Val299 |
| Cys336                            | Cys324 |
| Tyr337                            | Tyr325 |
| Gly338                            | Gly326 |
| Leu339                            | Leu327 |
| Ala340                            | Ala328 |
| Glu341                            | Glu329 |
| Leu344                            | Leu332 |
| Ala345                            | Leu333 |
| Phe348                            | -      |
| Cys387                            | Ser374 |
| <b>Hinge region residues</b>      |        |
| Thr443                            | -      |
| Asp445                            | Asp440 |
| Val456                            | Val451 |
| Gly458                            | -      |
| Arg459                            | Arg454 |
| <b>C-terminal domain residues</b> |        |
| Ser549                            | -      |
| Lys551                            | -      |

Supplementary material S3-S6:

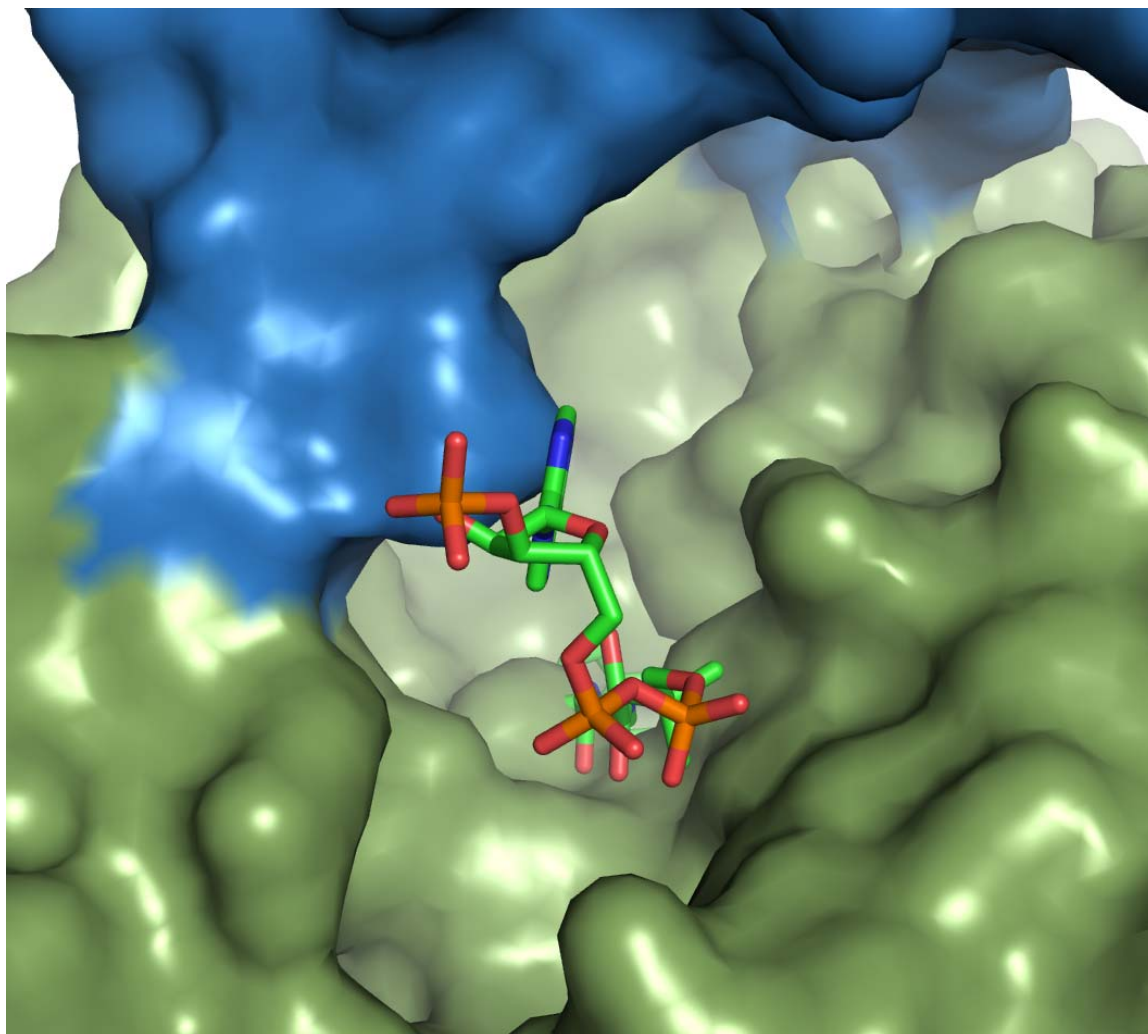

S3. Putative CoA binding cavity in AsFaal. The N and C-terminal domains are shown in green and blue. CoA from the bound structure (3CW9) is overlaid on the unbound structure (3CW8). The cavity is big enough to accommodate CoA. However, critical interactions with CoA are missing.

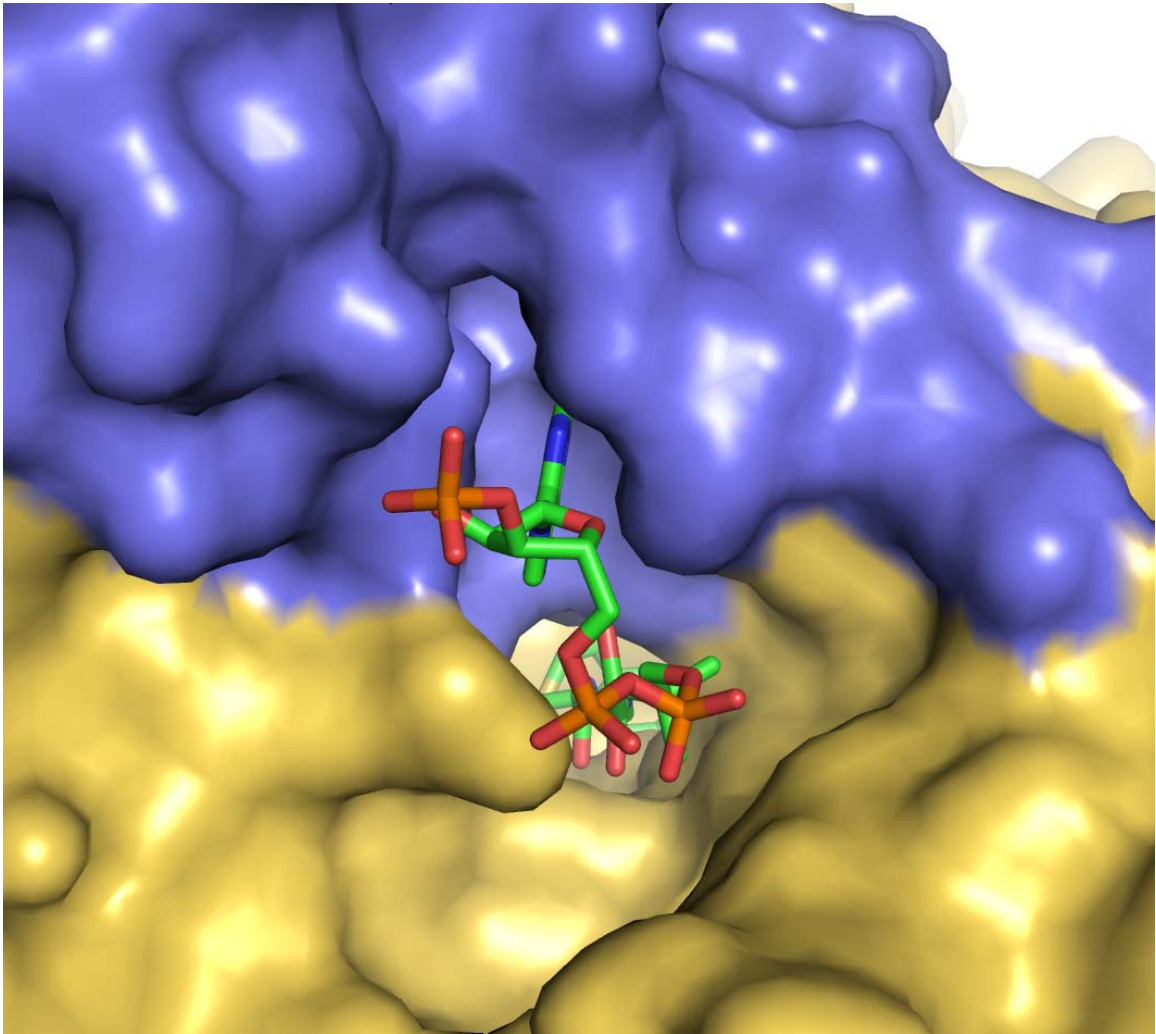

S4. CoA bound AsFAAL (3CW9). The N and C terminal domains are shown in yellow and blue. It is clear that the C-terminal domain has reoriented to make contacts with CoA.

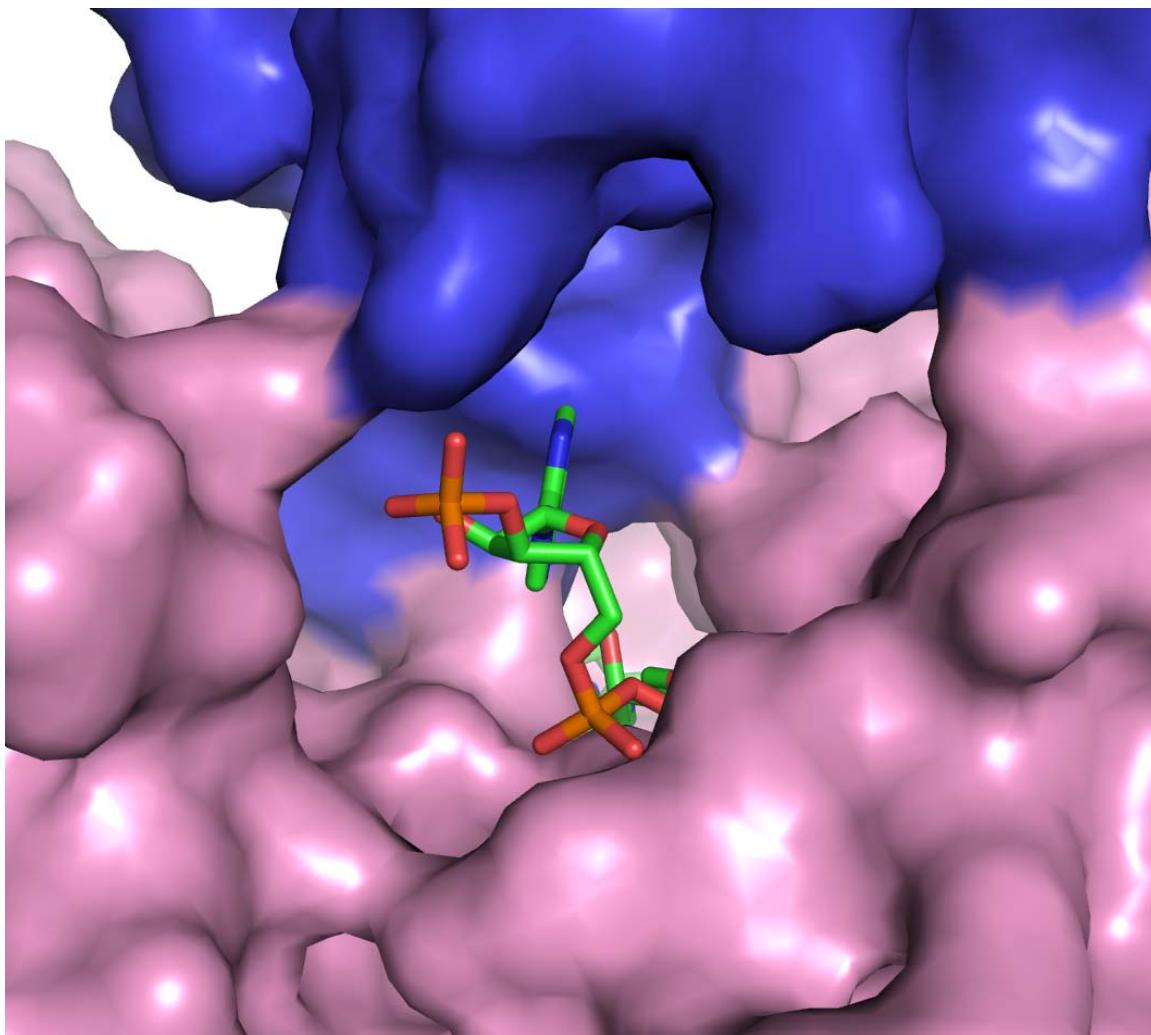

S5. CoA from AsFaal overlayed on EcFaal after least square fit of the two models (3CW8 and 3GQW). The N and C terminal domains are shown in pink and blue. The cavity is big enough to accommodate CoA but the C domain has to move to make critical contacts which is prevented by the strong interaction between the insertion motif and the rest of the protein.

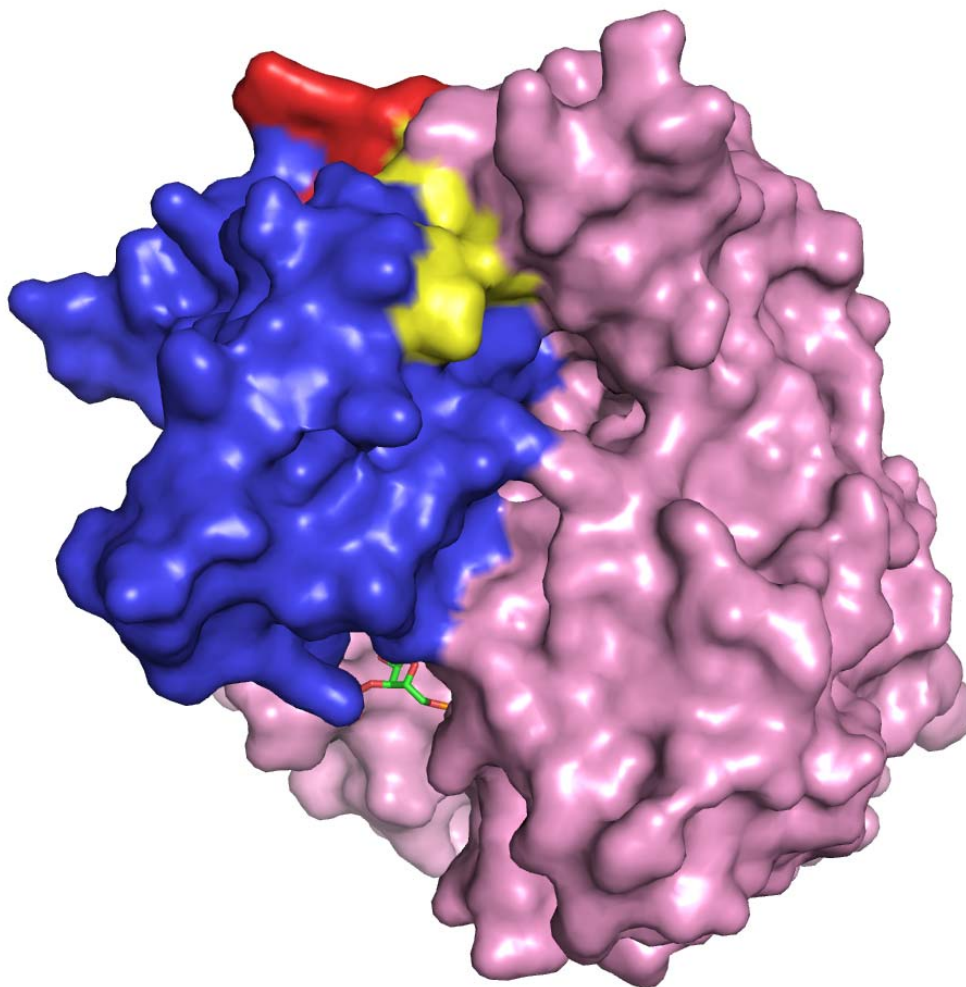

S6. The interaction region between the insertion motif and the C-domain is shown in yellow. These strong interactions restrain C terminal domain movement.

## Supplementary material S7

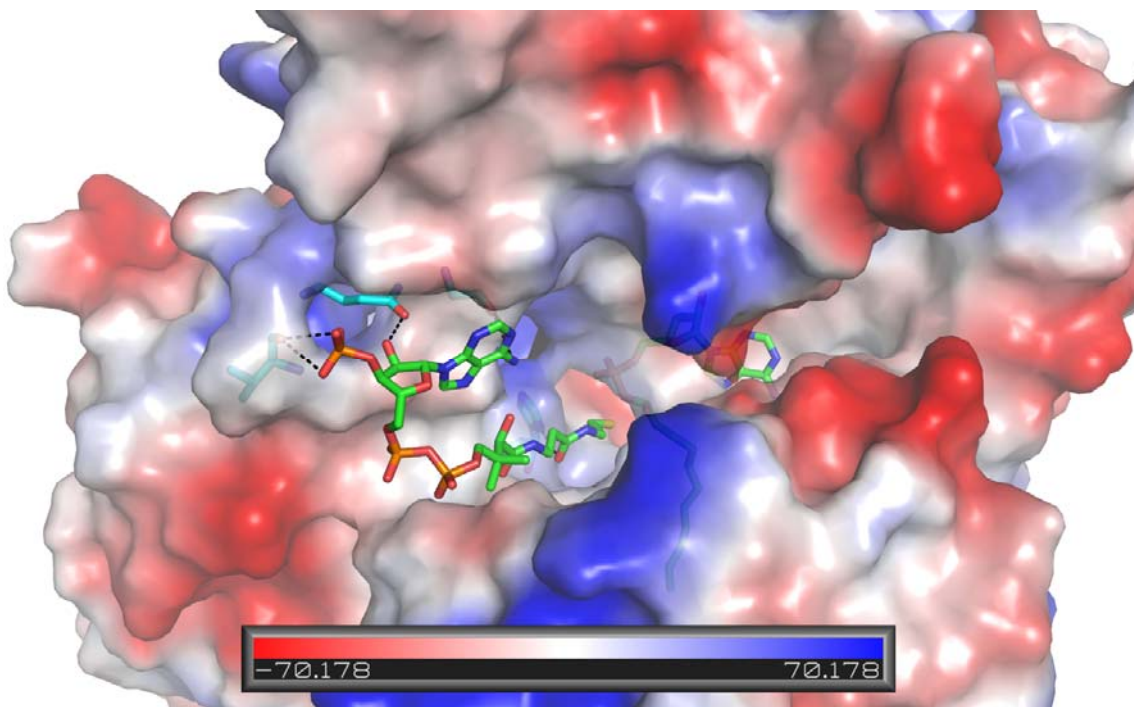

S7. *Ec*FAAL and *Lp*FAAL were modeled to thioester binding conformation by superimposing FAAL C-terminal domain to the *As*FACL (3CW9) C-domain which removes the constraints due to insertion motif interactions. The electrostatic surface analysis shows there are similar non-polar binding pocket for CoA adenylate binding. There are narrow tunnel point to the acyl-adenylate binding site, suggesting the mercaptoethylamine and pantothenic acid group binding. CoA was then model into the binding site.
